# Supplementary material for: IL-21–producing effector Tfh cells promote B cell alloimmunity in lymph nodes and kidney allografts
Source: PubMed Central journal article supplement (PMC10619486; doi:10.1172/jci.insight.169793), 2023-10-23
Supplement: jciinsight-8-169793-s262.pdf [file jciinsight-8-169793-s262.pdf]

## Supplemental material

Figure S1

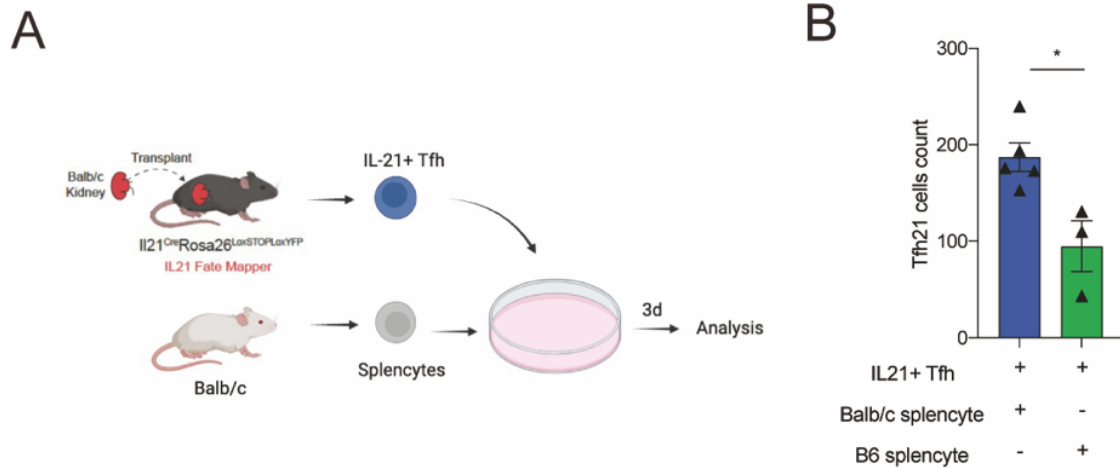

**Figure S1. The donor-reactivity of IL-21 producing Tfh cells was detected by mixed lymphocyte reactions.**

(A): Schematic of Tfh cell MLR assay. IL-21 producing Tfh cells (30k cells/well) sorted from allogeneic transplantation recipients were culture with syngeneic (B6 mice) or allogeneic (Balb/c mice) donor splenocytes (100k cells/well) for 3 days.

(B): Quantification of Tfh cells as a total number in the culture system.

**Figure S2**

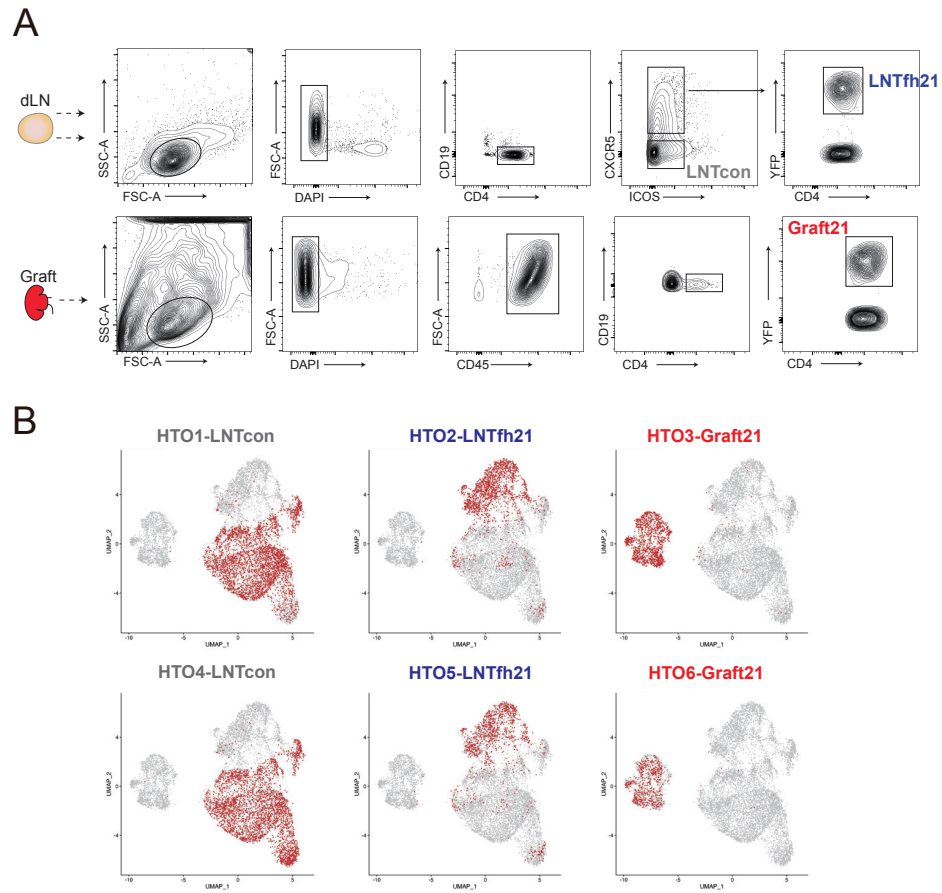

**Figure S2. Sorting strategy and individual sample assignment in the single cell RNA-seq experiment.**

(A) Sorting strategy for indicated populations of Tcon (CD4+CXCR5-YFP-, “LNTcon”), IL-21 producing Tfh (CD4+CXCR5+YFP+, “LNTfh21”) from dLN and intragraft CD4+YFP+ (“Graft21”) that underwent scRNAseq analysis.

(B) Assignment of cells to individual samples based on hashtag oligo (HTO) differential expression.

**Figure S3**

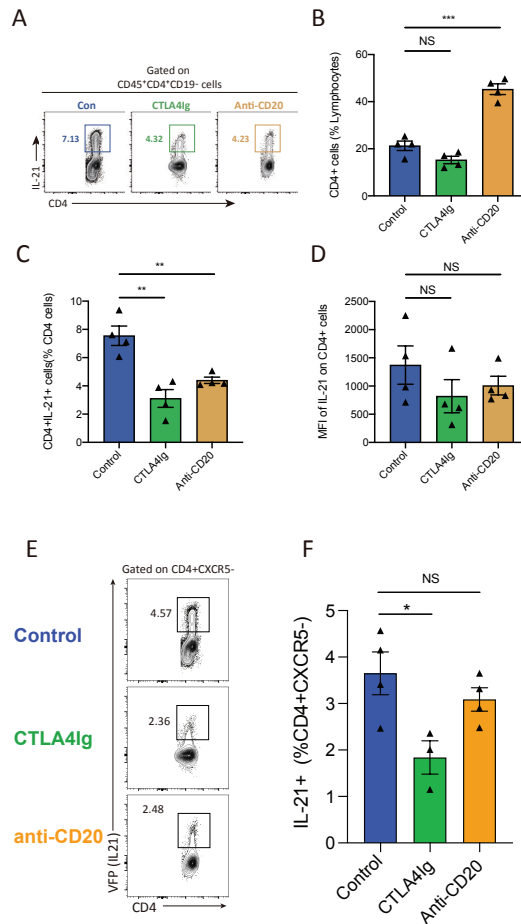

**Figure S3. CTLA-4Ig and B cell deletion inhibited IL-21<sup>+</sup> proportion of T cells and DSA production.**

Gating strategy (A) and frequency of CD4<sup>+</sup> T (B), CD4<sup>+</sup>IL-21<sup>+</sup> T cells (C) and IL-21 expression levels on total CD4<sup>+</sup> T cells (D). Representative gating (E) and quantification (F) of the frequency of IL-21<sup>+</sup> cells in CD4<sup>+</sup>CXCR5<sup>-</sup> T cells.

n=3-4 mice replicate per group. Statistics: Student's two-tailed unpaired T test, NS: not significant; \*\*: P < 0.01; \*\*\*: P < 0.001.

**Figure S4**

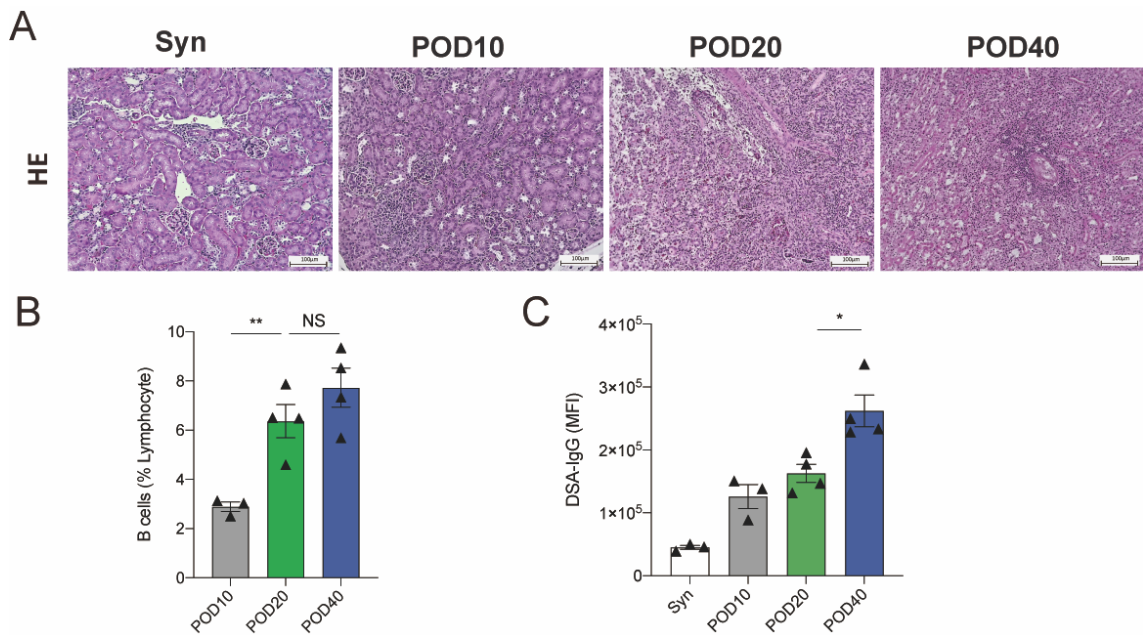

**Figure S4. Kidney allograft rejection kinetics.**

(A): Representative histological images of transplanted kidneys for syngeneic (Syn), allogeneic postoperative days 10, 20, and 40. The results showed a progressive increase in monocyte infiltration in the grafts over time. Notably, indications of tubulitis and glomerulonephritis emerge by day 10 and become severe by day 40 post-transplantation. HE: hematoxylin and eosin staining. Magnification: 100 $\times$ , scale bars: 100 $\mu$ m.

(B): Quantification of graft infiltrating CD19<sup>+</sup> B cells in total lymphocytes at different timepoint.

(C) Total IgG DSA from the serum of syngeneic and allogeneic recipients 10, 20, and 40 days after transplantation.

**Figure S5**

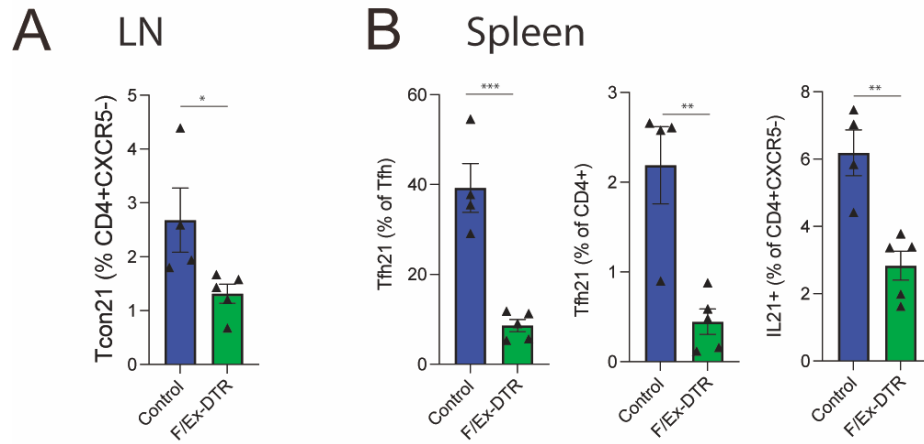

**Figure S5. IL-21 producing Tfh cells were deleted in F/Ex-DTR mice.**

(A): Quantification of Tcon21 (CD4<sup>+</sup>CXCR5<sup>-</sup>YFP<sup>+</sup>) in CD4<sup>+</sup>CXCR5<sup>-</sup> cells in dLNs.

(B): Quantification of IL-21 producing Tfh (Tfh21) and Tcon21 (CD4<sup>+</sup>CXCR5<sup>-</sup>YFP<sup>+</sup>) in spleens of recipient mice.
